# Supplementary material for: The Development of a Novel Questionnaire Approach to the Investigation of Horse Training, Management, and Behaviour
Source: Animals (Basel). 2020 Oct 24;10(11):1960. doi: 10.3390/ani10111960 (PMC7693391; doi:10.3390/ani10111960)
Supplement: Supplementary file 1 [file animals-10-01960-s001.xlsx]

## Sheet: Supp File 1
Rotated Component	Question
Temperament	During the previous 6 months, has [horse_id] strongly avoided, shied or bolted away from the following?
T_1	Bicycles
	Motor bikes, quad bikes or tractors
	Cars, trucks or trailers
	Horse and cart
	Chain saws or lawn mowers
	Umbrellas or tents
T_7	Wild animals (deer, kangaroo)
	Domestic animals (cow, sheep, chickens)
	Uncommon domestic animals (alpacas, pigs)
T_15	Plastic bags
T_16	Children
	Dogs
	Some horses show signs of anxiety when left alone or when taken away from other horses. Thinking back (over the past 6 months as a reference), how often does [horse_id] show signs of each of the following behaviours when left alone?
T_2	Trembling
	Sweating
	Fence walking
	Trotting, cantering or galloping in the field
	Box walking
	Vocalising (calling out or neighing)
	Pawing
T_10	Pulling back when tied
	Pulling back when tied (away from home)
	Not standing still when tied
	Will [horse_id] stand for (without restraint or when restrained by a head collar and lead rope):
T_3	General examination by veterinarian
	Teeth examined by dentist/veterinarian
	Feet to be cleaned
	Feet to be trimmed
	Feet to be shod
T_12	Body clipped with electric clippers (without sedation)
	Facial area tidied with electric clippers (without sedation)
	Some horses display defensive or aggressive behaviour in certain situations. Typical signs would include threatening to bite, pinning ears, tail swishing, threatening to kick or strike. The most serious signs would include actual biting, kicking or striking. Check a box on the 5 point scale below to indicate your horse's recent tendency (using the previous 6 months as a guide) to show these behav…
T_4	When being led towards an unfamiliar horse
	When being ridden/driven towards an unfamiliar horse
	When being led beside an unfamiliar horse
	When being ridden/driven beside or in front of an unfamiliar horse
	When being ridden/driven in a group of horses (i.e. trail ride, hacking)
	When being ridden/driven in an arena with other horses (i.e. warm up, clinic, group lesson)
T_5	When the horse is sponged down
	When the horse is hosed down
T_11	When groomed by you
	When groomed by someone else
T_13	When a saddle is placed on his/her back
	When the girth is done up
T_14	When verbally corrected by you or another person on the ground
	When verbally corrected when ridden/driven
T_Non-Loading	When approached by a familiar dog
	When approached by an unfamiliar dog
	When being lunged or worked in a round pen
	When signalled to canter on the lunge
	When approached by you in the paddock
	When approached by you in the stable
	When approached by you when eating from a bucket or manger
	When signalled to canter under saddle/driving
	How often does [horse_id]?
T_6	Yawn before work
	Yawn during work
	Yawn after work
T_Non-Loading	Crib-bite (sucking in air with teeth on fence or other object)
	Chew rugs
	Chew wood (fence or stable)
T_8	Paw prior to feeding
	Paw when feeding
	Hold up one foot when feeding
T_Non-Loading	Undo gates
	Dunk hay in water
	Play with water
	Wind-suck (sucking in air, not touching fence or other object)
	Self-mutilate
	Grind teeth
T_17	Chew bark
	Eat faeces
	Eat soil
	Does [horse_id]?
T_9	Move off while you are mounting
	Walk or trot off after mounting and before being asked
T_Non-Loading	Defacate in feedbin
T_15	Get distracted easily by unfamiliar sights
	Will [horse_id] stand for (without restraint or when restrained by a head collar and lead rope):
T_Non-Loading	Taking rectal temperature
	Administration of oral worming paste
	Flank area to be groomed
	Does [horse_id]?
T_Non-Loading	Get distracted easily by unfamiliar sounds
Equitation
	Does [horse_id]?
E-1	Raise head to avoid rein or lead rope cues
	Toss head when being ridden/driven
	Pull on reins or lead rope when signals are applied
	Brace neck when rein or lead rope signals are applied
	Move faster or raise head when anticipating the transition to canter
E_2	Load first time onto the trailer
	Load first time onto the truck
	Unload slowly off the trailer
	Rush off the trailer backwards when loading
	Unload slowly off truck
E_3	Slow when signalled to go faster
	When ridden or driven, how responsive is [horse_id] to:
E_3	Leg pressure to go from walk to trot
	Leg pressure to go from trot to canter
	Rein tension to turn
	Seat cues for upward transitions
	Does [horse_id]?
E_4	Rear when signalled to go forward
	Rear up when led
	Rear up and flip over at any time
	Rear up under saddle
E_5	Fail to slow when signalled by a rein or lead rope cue
	Fail to stop when signalled by a rein or lead rope cue
E_6	Refuse to go through water under saddle/when driven
	Refuse to go through water when led
E_7	Throw head up when bridled
	Pull back when bridled
	Pull back when un-bridled
E_Non-Loading	Come when called in the field
	Move away when being caught
E_8	Walk into handler when led
	Push handler when offered food
E_Non-Loading	Back when signalled to move forward
	Not move when signalled with leg or whip cues
E_10	Buck, pigroot or kick out when signalled to canter
	Buck at other times (when ridden)
	Unseat rider when bucking, pigrooting or kicking out
	When ridden or driven, how responsive is [horse_id] to:
E_5	Rein tension to slow from walk to halt
	Rein tension to slow from canter to trot
E_11	Voice cues to increase gait
	Voice cues to decrease gait
	Does [horse_id] pull on the lead rope, in a familiar/normal situation, when:
E_8	Leading and walking forward
	When leading and signalled to stop
	When teaching a new lesson, does [horse_id]?
E_Non-Loading	Learn quickly with pressure cues
	Learn quickly when corrected
	Learn quickly when punished
	Learn quickly with food rewards
	When ridden or driven, how responsive is [horse_id] to:
E_9	Whip application
	Spur application
	Seat cues for downward transitions
	How often does [horse_id]?
E_Non-Loading	Groan when being ridden
	Have its nose behind the vertical when ridden in trot
	Need repeated steering to remain on a set course or line
	Bolt (gallop uncontrollably)
	Buck when playing in the field/pasture
	Refuse to jump an obstacle
	Pull back when tied
	Rear when loading onto the trailer or truck
	Rush through doorways or gateways	134 behavioural items
Maintenance
	During the previous 6 months, how often has [horse_id]:
M_Non-Loading	Been trained using food rewards
M_1	Been ridden/driven/handled by beginners or novice riders (less than 1 year of experience)
	Been ridden/driven/handled by children
	Been ridden/driven/handled by men/boys
	Been ridden/driven/handled by professionals
	Been ridden/driven/handled by teenagers
M_3	Done ground/in-hand work
	Been lunged
	Have to be lunged, long-reined, loose schooled or round penned before riding/driving/handled
	Done round pen, loose schooling or liberty work at speed (trot or faster)
M_5	Travelled in a float/trailer
	Been to a show/competition
	Gone on a trail ride (or drive in the field)
M_Non-Loading	Been ridden/driven in a lesson
	Been trained in an arena
	Done clicker training or liberty work at walk
	Been long-reined
	Time spent with horse
	When ridden during the previous 6 months, has [horse_id] worn?
M_2	A crupper
	Draw reins (for lunging)
	Draw reins (for riding)
	Grass reins
	A standing martingale
M_4	An English saddle
	A Western saddle
	A Western curb (shanked) bit
M_Non-Loading	An Australian Stock saddle
	No noseband for riding
M_6	An English curb bit (including Weymouth, pelham, kimberwick and so on)
	A double bridle
M_7	A bareback pad
	A bitless bridle
	A headcollar for riding
	A snaffle bit (including multi-jointed, eggbutt, full-cheek and so on)
	A treeless saddle
M_Non-Loading	Gag bit
	Running martingale
	A crank (Swedish) noseband with a flash
	A crank (Swedish) noseband without a flash
	A cavasson noseband
	A drop noseband
	A grackle (crossed or figure 8) noseband
	Side reins (for lunging or riding)
	A bosal (Western hackamore)
	An English hackamore
	Thinking back over the previous 6 months, how many times has [horse_id]?
M_Non-Loading	Had body-work (chiropractic, massage etc.) done
	Had a dental examination by a horse dentist or veterinarian
	Been examined by a veterinarian for any reason (other than vaccinations or teeth)
	Been wormed (with a commercial wormer such as a paste, drench, pellets)
M_8	Had feet trimmed by a professional
	Had feet trimmed by a non-professional	50 maintenance and gear items

## Sheet: Supp 2 Temperament
	Cut based on FA	RC1	RC2	RC7	RC3	RC4	RC10	RC8	RC12	RC6	RC16	RC15	RCM	RC5	RCM	RC9	RC17	RCM	RC13	RC11	RC14	RCM	RC23	RCM	RCM	RC25	RCM	RC27	Unloaders		Number of Factors loading
ridden_bicycles		0.686737	0.0291542	0.29302	-0.0460072	-0.106706	0.11964	-0.0387849	0.054947	0.0843054	0.0722011	0.0274781	-0.0113744	-0.0628825	0.0464915	0.0466643	0.0591022	-0.0233228	0.0182359	0.017754	0.042212	-0.052466	-0.119329	-0.0117815	0.0260402	-0.0177154	0.0539456	-0.0507788	FALSE		1	0	1
ridden_motor_bikes		0.761545	0.0801036	0.180307	-0.077535	-0.070126	0.0639456	0.0100433	-0.0270325	0.0765579	0.000265493	0.0634572	0.0200343	-0.0601532	-0.0884536	0.120031	0.105358	-0.0452464	0.054098	0.0624882	0.0416312	-0.0142306	0.0447777	-0.0713467	-0.0683206	0.00220791	-0.021429	-0.00335863	FALSE		1	0	1
ridden_cars		0.709152	0.0380773	0.186921	-0.0926653	-0.0285069	0.0958698	0.055176	-0.0117929	0.0800167	0.1984	0.0451827	-0.0215466	-0.0643044	-0.0742798	0.0849515	0.0868847	-0.0421516	0.00508216	0.0736612	-0.0376158	-0.0561536	0.0550915	-0.0240697	0.037816	0.0266859	-0.00497862	0.0151678	FALSE		1	0	1
ridden_horse_cart	Cut	0.501712	0.0605586	0.375872	0.0229081	-0.00740734	0.168232	-0.00941934	-0.00590909	0.0492319	0.0601631	-0.00835911	0.0437654	-0.02575	0.0442268	-0.0825372	-0.00752412	0.0469504	-0.0549526	-0.0701805	-0.0380447	0.0641807	0.571789	0.0451314	-0.0601523	-0.0185275	0.0101977	0.0121865	FALSE		2	0	2
ridden_chain_saw		0.706375	0.124262	0.189249	-0.0278419	-0.111921	0.00984316	0.107226	-0.155651	0.0180634	0.147331	0.115623	0.0429341	-0.0108864	-0.0211026	0.0121357	-0.0521177	0.040649	0.0179382	0.0850243	-0.0982794	0.0751613	0.0764837	0.0475457	-0.00732901	0.116394	-0.0639816	-0.0103748	FALSE		1	0	1
ridden_umbrella		0.597058	0.0982323	0.274586	-0.0294202	-0.0419001	0.0750725	0.0398306	-0.0561005	0.00574088	0.124167	0.427569	-0.00682356	0.0111987	-0.00496676	-0.0121768	-0.0220785	0.0414957	-0.0870236	0.0995776	-0.142355	0.0343065	0.0486054	0.054997	0.105384	0.123667	-0.12258	0.0834525	FALSE		1	0	1
ridden_children		0.363268	0.0537874	0.304926	-0.0248794	-0.0119613	0.0794544	0.00303421	-0.102483	-0.040539	0.620954	0.0293793	-0.0244913	0.052783	-0.0683323	-0.0685049	0.0435381	0.0133922	0.0409504	0.00779277	-0.0306601	0.00763756	0.0112246	0.113655	-0.0652434	0.0714648	-0.0489062	0.0809028	FALSE		1	0	1
ridden_dogs		0.220147	0.0722592	0.350104	-0.091202	-0.110221	0.0779026	0.0151351	0.0421591	0.0764736	0.654557	0.109865	0.0432062	-0.127057	0.0352158	0.0843943	-0.0784431	-0.0399535	-0.0707081	0.0707207	-0.0679147	-0.0393209	-0.00101874	-0.100503	-0.016398	-0.0291914	-0.0463097	-0.0781839	FALSE		1	0	1
ridden_wild_animal		0.303464	0.0436918	0.709618	-0.0534453	-0.0655768	0.14214	-0.0503527	0.00268962	0.0328783	0.130467	0.187851	0.0289403	-0.0262662	-0.00697253	0.0307323	0.0249043	0.0140705	-0.0153971	0.0741963	-0.0579558	0.00676738	0.0507924	-0.0311557	0.0120776	-0.026944	0.0163384	-0.0412535	FALSE		1	0	1
ridden_domestic_animals		0.221469	0.0747658	0.748683	-0.0197721	-0.0609328	0.123118	0.0585176	-0.0187906	0.016099	0.222992	0.0453548	-0.0155718	-0.00452975	0.0131066	0.10566	0.0819509	-0.0114548	-0.00625452	0.00849688	-0.0353845	-0.041059	0.0663348	-0.020401	-0.0267301	0.0434096	0.0727207	-0.0563235	FALSE		1	0	1
ridden_uncommon_domestic		0.324845	0.0720192	0.793467	0.00160469	-0.0895255	0.0289334	0.00985829	-0.0180187	0.0688295	0.0120489	0.0229053	0.0201172	-0.0280345	-0.0342396	-0.0131086	-0.0115778	-0.0184201	0.00403116	0.0350782	-0.0364306	0.0423035	0.0323078	-0.0042207	-0.0208848	0.109853	-0.0682764	0.00677138	FALSE		1	0	1
ridden_plastic_bag		0.40667	0.0751549	0.29372	-0.0382212	-0.122406	0.0906152	-0.00949885	0.00526519	0.0478414	0.174526	0.522289	0.00267658	-0.0777175	0.0685065	-0.0158012	-0.0816361	-0.0781479	-0.108087	0.0479482	-0.158993	0.0711089	-0.137004	0.0908142	0.122199	0.129382	-0.0333362	-0.0176806	FALSE		1	0	1
vet		-0.0821717	-0.0963636	0.00186032	0.5873	-0.0265292	-0.0336946	-0.0883642	0.338334	-0.00584009	-0.0700442	-0.0829294	0.0627682	-0.063694	0.00617644	-0.104978	-0.0133015	0.0226474	-0.00413257	-0.0163086	0.093213	0.0388183	-0.0327144	-0.109721	0.131114	-0.0543609	-0.0772142	-0.303602	FALSE		1	0	1
dentist		-0.060239	-0.158213	-0.073269	0.52013	0.0319611	0.0170111	-0.0266501	0.350109	0.000178886	0.0328824	-0.077263	0.060542	-0.033422	0.00314858	-0.0785952	0.0550904	-0.0539173	0.0439143	0.0362653	0.0778682	0.0875768	0.0319988	-0.195933	0.139865	-0.0373333	-0.102746	-0.261728	FALSE		1	0	1
temperature	Cut	-0.105429	-0.130566	0.00913504	0.467813	0.0154655	-0.0323498	-0.125294	0.47846	-0.066857	-0.120904	0.0149466	0.0287313	0.0499049	0.015132	-0.0238707	0.0934834	0.0210982	-0.00531161	-0.00351491	0.102741	0.0162879	-0.0487083	-0.0829269	0.0824299	-0.0832759	-0.10243	-0.217664	TRUE		0	0	0
worming	Cut	-0.141597	-0.116212	-0.0293491	0.410693	-0.00595655	0.0891451	-0.109319	0.341916	-0.0288512	-0.00171198	-0.0407879	0.0392119	-0.0540228	0.0696157	-0.14232	0.0525619	0.036061	0.110859	0.0425763	0.0682971	0.0840973	-0.102252	-0.272626	0.084251	0.0196252	-0.0857091	-0.0299468	TRUE		0	0	0
feet_picked		-0.0979032	-0.00773325	-0.00631717	0.812159	0.0277813	-0.115261	0.00630764	-0.042967	0.0072562	0.00620058	-0.0321089	-0.0348589	0.0108332	0.0253605	-0.0734674	0.0336465	0.0169427	0.0216716	-0.0424685	0.0413565	-0.0189826	-0.0319994	0.0181084	-0.00902927	-0.0140844	0.0265845	0.0584747	FALSE		1	0	1
feet_trimming		-0.0591635	-0.0318329	0.00287358	0.853697	-0.00541834	-0.0648776	0.00154294	-0.00152343	0.0347777	-0.0527575	-0.00193133	-0.0712533	0.00189831	0.0216907	-0.052531	-0.0182835	-0.0341681	-0.0278365	0.00225143	-0.0289024	-0.0187672	-0.0226101	0.0453192	0.0340987	-0.00922263	0.0824639	0.032001	FALSE		1	0	1
shod		-0.0439463	0.025226	-0.108868	0.734604	0.0112412	-0.0504041	-0.0475899	0.178951	-0.0133144	-0.0453157	0.0213005	-0.0700742	0.0966819	0.0565693	0.0570336	-0.106784	0.0299626	-0.0434328	-0.00274458	-0.0853059	0.0240907	0.122366	0.187916	-0.0457152	0.0048798	0.100732	0.11452	FALSE		1	0	1
flanks	Cut	-0.124833	0.0353726	0.0352453	0.346114	-0.00131651	-0.13273	-0.0568604	0.180331	-0.00365915	-0.0993301	0.151499	-0.0893954	0.0778975	0.0059575	-0.194063	-0.0331479	0.145733	-0.0305493	-0.0491307	0.210696	-0.122783	-0.242416	-0.022549	-0.0256105	-0.143826	-0.282662	-0.057578	TRUE		0	0	0
clipping	Cut	-0.170805	0.00771318	-0.020252	0.155862	-0.00356722	-0.0693641	0.0112413	0.831193	-0.016415	-0.0618323	-0.0313222	-0.0103989	0.0339146	0.000165575	0.037336	-0.0634783	9.51028e-05	0.00475436	-0.0229956	-0.0359548	-0.0158318	0.00244983	0.0821638	-0.0583213	-0.0480656	0.0416913	0.0786501	FALSE		1	0	1
face_clip		-0.178507	-0.0348101	-0.0182044	0.160553	0.0515307	-0.097546	0.0412707	0.820067	-0.0348347	-0.0145871	-0.0732736	-9.21247e-05	0.043288	0.0275272	-0.0715913	-0.000557541	0.0726859	-0.00620393	-0.00044511	-0.0295265	0.0626425	0.0165479	0.0592556	-0.0795341	0.000874246	0.0413843	0.027067	FALSE		1	0	1
bicycles		0.72313	0.0797103	0.213026	-0.0387625	-0.0796436	0.0533024	0.013208	0.00802819	0.0753023	0.0378014	0.0313507	-0.00620098	0.00721891	0.0539571	0.0198731	0.0453703	0.0373401	-0.0180362	-0.12959	0.00147275	-0.135518	-0.164997	-0.0603468	0.0461043	-0.0463243	0.0819744	-0.0116547	FALSE		1	0	1
motor_bikes		0.802639	0.107527	0.100701	-0.0742235	-0.00478172	0.0670998	0.0436532	-0.0417282	0.042942	-0.0361699	-0.0419744	0.0359638	-0.0102742	-0.0418179	0.0888503	0.0778192	0.0179316	0.0566481	-0.0465962	0.0574129	-0.0623818	0.00410787	-0.117714	-0.0851984	-0.0271076	0.00994645	0.0204611	FALSE		1	0	1
cars		0.774056	0.0608213	0.0492497	-0.0686253	0.00684854	0.0461213	0.0768467	-0.069225	0.0332856	0.157353	-0.0572257	0.0563311	0.0032363	-0.00546731	0.0564681	0.0177544	0.00560958	0.00238214	-0.0451113	-0.0335603	-0.065548	0.0701984	-0.0383468	0.00343088	0.0133681	0.0903657	0.0310297	FALSE		1	0	1
horse_cart		0.553744	0.0400672	0.314689	0.0224957	-0.0304121	0.130933	-0.00679438	-0.0542114	0.0343568	0.0217941	-0.0405663	0.0527759	-0.0181434	0.0790056	-0.092695	-0.0465723	0.0780779	-0.0641827	-0.0916787	-0.0119225	0.0889705	0.550561	0.00917909	-0.0349619	-0.0608607	0.054684	0.0142718	FALSE		2	0	2
chain_saw		0.746145	0.158774	0.0890376	-0.037243	-0.0776777	-0.0470805	0.0900921	-0.189593	-0.0666964	0.0282695	0.0346568	0.0673424	-0.0166432	-0.0162799	-0.0164486	-0.0461419	0.0846863	-0.0187333	-0.0231398	-0.0946066	0.0624916	0.148521	-0.0102623	-0.0230007	0.0359716	-0.0470907	-0.000773358	FALSE		1	0	1
umbrella		0.624691	0.157655	0.232964	0.00673352	-0.0315726	-0.0233494	0.0830845	-0.113233	-0.0289244	0.116355	0.40821	0.0291615	0.0215626	0.0361773	-0.0583984	-0.0178529	0.0886341	-0.0544347	0.0126789	-0.0914577	-0.00705196	0.0316888	0.05805	0.127773	0.107486	-0.103777	0.0997728	FALSE		1	0	1
children		0.384915	0.0268974	0.248941	-0.0433383	0.0473733	0.00685118	0.0303776	-0.150264	-0.0939285	0.615978	0.0375226	0.0166922	0.0794481	-0.0337313	-0.0785323	0.0302207	0.0984541	0.0487822	-0.128439	-0.0114324	0.020691	0.074063	0.0613494	0.0184969	0.0998177	0.0306972	0.0983736	FALSE		1	0	1
dogs		0.216774	0.142073	0.297864	-0.0681826	-0.0603506	0.0329046	0.0164705	-0.0140404	0.0702428	0.692394	0.0446293	0.0196561	-0.0384518	-0.000818375	0.0882764	-0.0453012	0.044965	-0.0658622	0.0333018	-0.0377321	-0.0837599	-0.0100252	-0.127899	0.0265053	0.0187034	0.0335806	-0.0836485	FALSE		1	0	1
wild_animal		0.284296	0.0821022	0.684552	-0.0491345	-0.0565904	0.0400372	-0.00664084	-0.0233172	0.0337962	0.141859	0.133027	0.0357882	-0.0117031	0.0100666	-0.0186318	0.0140919	0.129259	-0.0446222	-0.03184	-0.011612	-0.0525285	-0.00849517	-0.0832609	0.0379661	-0.0527912	0.0768117	-0.0198034	FALSE		1	0	1
common_domestic_animal		0.22893	0.0990973	0.717257	-0.0216013	-0.0381375	0.0256905	0.103611	-0.00267248	-0.038218	0.246034	0.025462	0.0175046	0.010943	0.0322601	0.0666408	0.0255565	0.0514708	-0.062579	-0.0950754	-0.0323196	-0.0592503	0.00822066	-0.0072393	0.0542665	0.0137127	0.0962367	0.0746329	FALSE		1	0	1
uncommon_domestic_animal		0.319935	0.0892511	0.804201	0.000707865	-0.0668456	0.00608097	0.0149877	0.00623155	0.0592549	0.0491139	-0.00162673	0.0694474	-0.0361482	0.000325338	-0.0607105	0.0246671	0.0768337	-0.0202332	-0.0341147	-0.00569712	0.00181109	0.0584636	-0.0514468	0.0509293	0.111293	-0.0927305	0.0707306	FALSE		1	0	1
plastic_bag		0.490654	0.134863	0.208129	-0.0528774	-0.101095	0.0247313	0.00609123	-0.0760593	0.0060278	0.152288	0.525593	0.0113252	-0.0112633	0.0672186	-0.0231435	-0.10636	0.0156145	-0.11105	0.013255	-0.163792	0.0293684	-0.121265	0.068898	0.171967	0.0856143	-0.0633437	-0.0222771	FALSE		1	0	1
unfamiliar_horse_led		-0.146075	0.00566225	-0.0139172	0.00290792	0.651283	0.0209496	0.0979844	0.0107599	-0.122573	-0.0647953	-0.0151861	0.0838987	0.0811368	-0.0373162	0.10037	-0.102825	0.0544076	0.147691	0.0312181	-0.0159835	-0.0611967	0.0481073	0.0511671	-0.125606	-0.034796	-0.0456702	-0.016327	FALSE		1	0	1
unfamiliar_horse_ridden		-0.055747	0.0101913	-0.0590538	0.0247562	0.723758	0.00351977	0.0540213	-0.0314145	-0.108969	-0.0147822	-0.0114896	-0.0122165	0.128512	-0.0334038	0.0489624	-0.0715172	0.0782445	0.119861	-0.00160262	0.00767564	-0.0535094	-0.00901459	0.0736787	-0.0222648	0.00758241	0.0150739	-0.065165	FALSE		1	0	1
beside_unfamiliar_led		-0.0903498	-0.0423596	-0.0671515	0.00692871	0.75095	-0.0509162	-0.0381196	-0.03472	0.057791	0.00758396	0.00796867	0.0840286	-0.0112679	-0.0137303	0.00782542	0.0110799	-0.0692906	0.0475702	0.0469833	-0.0585445	0.0932427	-0.0191792	0.0178464	0.00582208	0.00451181	-0.0361997	0.0186202	FALSE		1	0	1
beside_unfamiliar_ridden		-0.00538445	-0.0528594	-0.0980817	0.00254991	0.79412	-0.0607058	-0.0400494	-0.00692881	0.0355152	0.021895	0.0260459	-0.0590314	-0.0836755	0.0520665	-0.0229294	0.111779	-0.0900918	0.0150795	-0.0290854	-0.0256377	0.123127	-0.0107546	0.0521112	0.0135096	-0.0154022	-0.00889823	0.0409999	FALSE		1	0	1
ridden_group		-0.0460115	-0.0420401	-0.0996116	-0.00640748	0.670958	-0.000155844	-0.102977	0.107898	0.00338143	0.0261047	0.0303885	-0.11421	-0.0051258	0.0724305	-0.0586508	0.0664896	-0.0503382	-0.0490339	0.0478931	0.139122	0.0336496	-0.0132748	-0.0268097	0.0533661	-0.0323385	0.00563395	0.051588	FALSE		1	0	1
ridden_group_arena		-0.0608151	-0.0515918	0.0451985	0.0204064	0.6483	-0.0140563	0.00240383	0.0193943	-0.0030078	-0.0952881	-0.140858	-0.0557939	0.0246634	0.0667508	-0.102948	-0.100488	0.0197479	-0.15646	0.0323386	0.142764	0.0704281	-0.00330909	0.0175521	0.0424885	0.0302566	0.0686927	-0.0116705	FALSE		1	0	1
verbal_correction		-0.0751982	-0.0389396	-0.0384457	0.0182605	0.0545613	-0.0629523	-0.0173669	0.00959151	-0.0831428	-0.0189855	-0.0658638	-0.023199	0.0322583	0.07197	-0.0380906	-0.0782008	0.0126535	0.0533117	0.0160648	0.725384	0.099935	0.0202328	0.0791391	-0.0340336	0.0708464	0.002774	0.0186526	FALSE		1	0	1
correct_ridden	Cut	-0.0923524	-0.0873025	-0.083621	0.0581385	0.0721856	-0.105662	0.0270388	-0.0253524	-0.0579211	-0.0839192	0.000322127	-0.0723	0.0633117	0.0126672	-0.0093429	-0.0467069	0.00387836	0.0486483	0.0980326	0.701357	0.152703	-0.0282513	0.117075	-0.0374773	0.0146454	-0.0318563	-0.0586515	FALSE		1	0	1
aid_correct_ridden	Cut	0.049434	0.00612595	-0.0712066	0.0344259	0.0794891	0.00885026	0.0591139	0.02263	-0.00997987	0.0713658	0.00256136	-0.0794918	0.0467031	-0.0471636	-0.0738529	0.00323336	-0.0456114	0.303476	0.0642395	0.261413	0.363185	-0.143391	0.0705079	0.0278944	-0.0992777	-0.0730258	0.172804	TRUE		0	0	0
approach_paddock		0.0134689	-0.0139175	0.085525	0.043771	-0.0280489	-0.140314	-0.00186262	-0.0163606	0.0172078	-0.146403	-0.0208176	0.0259821	0.0483947	0.643517	-0.0613092	-0.0408081	0.0519392	0.158073	0.0642163	0.0137748	-0.0340285	0.132254	-0.0225785	0.0751863	-0.0246134	-0.160262	0.0489515	FALSE		1	0	1
approach_stable		-0.106573	-0.0448896	-0.0016836	0.00230618	0.0233628	-0.0628448	0.0333722	0.0507405	0.0871809	0.100807	0.0173114	-0.000975036	-0.00504028	0.647454	0.0805291	0.0055147	-0.0683652	0.0494796	0.00483011	0.0236561	0.105233	0.0480414	0.0327688	-0.0362411	-0.0503175	-0.14097	-0.161398	FALSE		1	0	1
approach_unfamiliar		-0.0286707	-0.0462057	-0.0490923	-0.00281805	0.136874	0.140563	-0.0876287	0.0184527	-0.0271418	0.100021	-0.134922	0.0442828	0.175905	0.427069	-0.0411129	-0.0619226	-0.066744	-0.0247984	0.170455	0.283267	-0.273394	-0.0305259	0.0478633	0.0277132	-0.102339	0.0148146	0.144241	TRUE		0	0	0
approach_you_eating		0.0663843	-0.0431723	-0.0476599	0.0749288	0.0685075	0.0557535	-0.0990076	0.0501898	-0.112739	-0.0226524	0.0552515	-0.00247354	0.0946174	0.530675	0.0589194	0.0783712	0.0434834	-0.0343039	0.0466186	0.0056081	0.0941461	-0.154598	0.0739204	-0.219494	0.0933221	0.10674	0.0308188	FALSE		1	0	1
approach_with_feed		-0.0739988	0.0483546	-0.0404658	0.164578	0.0384404	0.059487	-0.0337341	-0.048762	-0.0930375	-0.00145088	-0.054659	0.0296191	-0.117106	0.317208	0.06133	-0.0433464	-0.0535458	0.163141	0.0242695	0.00791458	0.295442	-0.2744	0.140348	-0.14078	0.0928705	0.170998	-0.0333496	TRUE		0	0	0
groom_you	Cut	-0.0230256	-0.0536648	-0.0335068	0.0432735	0.0200915	-0.0541874	-0.013225	-0.000165854	0.034553	-0.0362279	0.017949	-0.0901507	0.109348	0.0534086	-0.0560356	-0.0362313	0.00664685	0.0919455	0.770343	-0.0300671	0.0974779	-0.0194041	0.0636108	-0.017718	-0.0350311	0.00356213	-0.00107885	FALSE		1	0	1
groom_other_person	Cut	0.0330922	-0.0266196	0.013264	-0.0840919	0.0971939	0.0362058	-0.0424645	-0.0228305	-0.0781999	0.0408918	-0.0127573	0.0684755	0.103493	0.0607913	-0.0269475	-0.0686615	-0.0535284	0.0321969	0.786188	0.174937	-0.0177537	-0.0302018	-0.0271323	0.0634246	-0.0156974	0.147076	-0.023557	FALSE		1	0	1
lift_feet	Cut	-0.0302325	-0.0493952	-0.0411297	0.270364	0.124277	-0.0941443	-0.0458432	0.0622993	-0.126738	0.0331516	0.0555676	-0.187746	0.172475	0.0427454	0.0247338	0.116033	0.108596	0.0392431	0.212926	0.0307929	0.0265209	0.157231	-0.0614043	-0.0946611	0.0734329	-0.090772	0.211787	TRUE		0	0	0
saddled		0.00209781	0.0382037	-0.0601869	0.01699	0.0546466	-0.0330849	-0.0596416	-0.0412517	0.033043	-0.0255646	-0.0498235	-0.0644737	-0.014182	0.114034	-0.0581471	-0.0881026	0.00662806	0.734667	0.0567462	0.0791735	-0.0139466	0.0114386	0.000360987	0.0181103	0.0519231	-0.0848807	0.0335396	FALSE		1	0	1
girthed		0.0145051	-0.0384087	-0.0260359	-0.0228925	0.0350626	-0.0172187	-0.00182551	0.0504296	-0.00511624	-0.0186076	0.0207277	0.0233743	0.0710831	0.0469704	-0.06053	0.0415882	0.0153195	0.750351	0.0432115	0.00657812	0.0658754	-0.0248784	0.0470817	-0.0297554	-0.0160816	0.0781863	-0.0565963	FALSE		1	0	1
sponged	Cut	-0.00787418	-0.0608205	-0.0107009	0.0752796	0.0555468	-0.0237831	-0.110611	0.0229548	-0.0101488	-0.0299464	-0.0738168	-0.00723078	0.773362	0.0036285	0.0455541	-0.038859	-0.0275064	-0.0718028	0.0728877	0.0475892	0.0299499	0.0454431	0.0701591	0.0416997	-0.000763682	-0.100001	-0.081372	FALSE		1	0	1
hosed		-0.0749102	-0.0578562	-0.0481916	-0.00481457	0.0194897	0.010677	0.0521981	0.0427812	0.0356711	0.0200186	-0.0211113	0.013293	0.708665	0.0299636	-0.0373322	-0.0111915	-0.0521324	0.0436789	0.132663	0.0580844	0.0652938	-0.0147551	0.0657593	-0.107083	-0.00596312	-0.0503203	0.0535315	FALSE		1	0	1
clipped	Cut	-0.101916	-0.00449178	-0.0511742	-0.0823032	0.0386179	0.0280265	0.00682648	0.0602481	0.0537416	-0.00640377	0.0528139	-0.139856	0.492357	0.214481	-0.1327	-0.0242904	-0.0186879	0.230479	0.0120363	-0.00714199	0.156307	-0.0645989	-0.108466	0.179489	-0.0446124	0.179548	-0.0106963	TRUE		0	0	0
familiar_dog		-0.0662464	-0.101799	0.0135704	0.0248518	0.123177	-0.00501994	-0.0142277	-0.0514626	-0.0953357	-0.112128	-0.00719688	0.0244018	0.0676929	0.0411879	0.0334683	0.0662407	-0.0131867	0.0264078	0.057745	0.153068	0.0270076	-0.0576026	0.640131	0.0712295	-0.018739	-0.0335465	-0.0430196	FALSE		1	0	1
unfamiliar_dog		-0.0910304	0.0435154	-0.148899	-0.00413827	0.0463638	0.0349633	-0.0622639	0.109041	0.0585359	0.052686	0.0280057	-0.00891346	0.0152612	0.0304454	-0.0449208	-0.00747043	0.0422482	0.0465139	-0.0109963	0.0614506	0.0279807	0.0461214	0.684683	0.0240856	-0.00762231	0.0341601	0.0166636	FALSE		1	0	1
round_pen_lunge	Cut	-0.0346785	0.0245257	0.0351826	-0.00978523	0.110839	-0.112575	0.0294684	0.0525681	0.0109153	-0.142839	-0.111915	-0.115412	0.0618382	0.153983	0.0321337	-0.121351	0.00387059	-0.00705408	0.105874	0.106214	0.60159	0.170482	0.0635404	0.0923904	-0.0114581	-0.0202701	-0.0999979	FALSE		1	0	1
rugging	Cut	-0.0289655	0.0546566	0.0644484	0.162007	0.0339094	-0.0936174	0.0348746	-0.117976	-0.056429	-0.0646434	-0.086142	0.0118762	0.305956	0.188178	0.0683895	-0.11313	0.026398	0.223561	0.116196	-0.0274009	-0.0500516	-0.149659	0.147847	-0.0382684	-0.0321611	-0.154862	-0.344089	TRUE		0	0	0
tail_handled	Cut	0.0123279	-0.0188506	-0.00913354	0.0582606	0.0247642	-0.0511521	0.00103171	-0.117605	-0.0263292	-0.0801915	0.109533	-0.239472	0.300387	0.323596	-0.0726512	0.0296154	0.113096	0.0443902	-0.115804	0.034183	0.0450139	0.0256471	-0.149221	-0.113381	-0.168055	0.143315	0.043009	TRUE		0	0	0
canter_lunge	Cut	-0.109198	-0.0229962	-0.0606332	0.0147229	0.102509	0.0116853	-0.091707	0.0318204	-0.0171472	0.0185731	0.0802759	0.0671581	0.131441	0.0101485	0.0505349	0.0138251	0.0631814	0.0199496	0.00105384	0.127852	0.705159	-0.0297448	-0.0234602	-0.0170482	-0.0332249	-0.010032	0.0407371	FALSE		1	0	1
unfamiliar_sights		0.276609	0.115597	0.340905	-0.0646761	0.0236831	0.172462	0.0833977	-0.143892	0.122072	-0.00236776	0.50614	0.106299	-0.0890017	-0.0768437	0.201184	0.0787063	-0.0808099	0.0948163	-0.0455779	0.0198657	-0.0197339	0.0445777	-0.0622807	-0.210243	-0.15752	0.0188256	0.0470513	FALSE		1	0	1
unfamiliar_sounds		0.325788	0.142347	0.304823	-0.0324745	0.0388217	0.179147	0.103755	-0.158301	0.110447	-0.0164333	0.477296	0.111036	-0.0818944	-0.101022	0.225867	0.0665135	-0.0166397	0.114974	-0.0448802	0.0447789	0.00166646	0.0343756	-0.0319534	-0.231632	-0.109689	0.0323787	0.0815058	TRUE		0	0	0
still_mounting		0.129652	0.11583	0.021941	-0.122845	-0.0158359	0.0646405	0.0908735	0.00426167	0.0191784	-0.00560573	0.00934932	-0.0223526	-0.0499697	0.00885787	0.772817	-0.00970978	0.024535	-0.0731545	-0.0410422	-0.0603352	0.0496436	-0.032459	-0.0164049	0.0336046	0.0566401	-0.0473949	-0.0518326	FALSE		1	0	1
walk_off_after_mount		0.087939	0.152754	0.0481172	-0.0815333	-0.00906373	0.109987	0.0742887	-0.0650312	0.00446291	0.0399103	0.0659203	-0.0509593	0.00264776	0.0464172	0.765796	0.0158181	-0.00447497	-0.076687	-0.0429712	-0.00257429	0.0151654	-0.0182707	0.014787	0.0547567	0.0276104	-0.033447	0.0670001	FALSE		1	0	1
trembling		0.177317	0.574982	0.0762775	-0.00647534	-0.0367775	0.138901	0.0731775	-0.0771715	0.018944	0.00852676	-0.0852144	-0.0429663	-0.00351086	0.0209583	-0.0476455	0.047355	-0.051857	-0.0585652	0.0172398	-0.0937585	0.0641646	-0.14264	0.0440171	-0.137369	0.210211	0.00331592	-0.18612	FALSE		1	0	1
sweating		0.113854	0.678117	0.083417	-0.0424397	-0.0644376	0.09655	0.0558639	-0.065814	0.0130099	0.0952211	-0.134365	-0.0488662	-0.0245991	0.0106092	0.0186488	0.0506258	0.020145	-0.0135367	-0.0186489	-0.0766529	0.0228301	-0.155446	0.0250117	-0.137231	0.164268	-0.039166	-0.0776874	FALSE		1	0	1
fence_walking		0.0472532	0.813849	0.0294562	-0.0151745	-0.00476692	-0.00238206	0.0483471	-0.0316855	0.0398919	0.0953982	0.0154648	0.0942612	-0.00170465	0.00112318	0.111058	0.0466073	0.00191263	0.0241877	0.0118129	-0.0373587	0.0188943	0.0544388	-0.0547622	0.0380251	-0.00446056	-0.0372672	0.158081	FALSE		1	0	1
canter_alone		0.128825	0.773971	0.0401655	-0.00200143	-0.0532014	0.0507662	0.0126521	-0.0207957	0.0045991	0.086858	0.091062	0.0416793	-0.0142269	-0.0967286	0.0652139	0.0740543	0.0459334	0.0401542	0.0151217	0.00844877	-0.0223687	0.0791304	-0.0619373	-0.0444688	-0.0849124	-0.00972027	0.0233293	FALSE		1	0	1
box_walking		0.137556	0.677706	0.0876963	-0.0140936	0.0400295	0.131054	0.0870547	0.00734791	-0.0420099	-0.0940643	-0.0288638	0.108677	-0.0254253	-0.0448719	0.0575901	-0.0618283	-0.0486543	0.0906201	-0.139201	-0.0417757	0.0160049	-0.036323	0.00247957	0.242978	0.0492988	0.0135544	0.316845	FALSE		1	0	1
vocalising		0.037108	0.736165	-0.00488084	0.0278585	-0.000284874	0.0458758	-0.0298469	-0.0218702	0.0745469	0.0179867	0.194525	-0.015128	-0.0428865	0.0309064	0.0703794	0.0739106	0.0146948	-0.00919498	0.0248047	0.0819944	-0.0527612	0.146027	-0.0138487	0.0792273	-0.143416	0.0888281	-0.105664	FALSE		1	0	1
pawing		0.0695417	0.608239	0.0654481	-0.0493515	-0.0742857	0.0822003	0.424877	0.0186557	0.0581174	-0.0347068	0.110072	0.0445988	-0.0768012	-0.00367667	0.0464134	-0.00336907	0.10823	-0.0585774	-0.0849131	-0.0347757	0.0128451	0.0461832	0.0133169	-0.0633544	0.0465288	0.0321061	-0.0692395	FALSE		1	0	1
jump_out	Cut	0.146149	0.490213	0.106059	-0.182371	0.00510435	0.244118	0.0294633	0.105504	-0.00179174	-0.0430837	-0.0208761	-0.00165153	0.0363963	-0.0555426	-0.0633105	-0.0100897	0.0417501	-0.0231394	-0.0912991	-0.0941002	0.0304483	-0.164296	0.14585	0.00206342	-0.044199	0.0691297	0.0251602	TRUE		0	0	0
alone_pull_back		0.135478	0.3178	0.1092	-0.101442	-0.00798263	0.690833	0.0286234	-0.127353	0.0160874	-0.030059	-0.0270282	-0.0313229	0.0617894	-0.0170071	0.0519744	0.0823686	0.00422941	-0.0902563	-0.0396789	-0.110205	0.0827714	-0.0479697	-0.013558	-0.0125821	0.00194603	0.0455423	0.0137929	FALSE		1	0	1
paw_away	Cut	0.12092	0.343136	0.0596605	-0.064024	-0.0419439	0.300527	0.405166	0.0346355	0.00986482	0.0021766	0.217491	0.0623741	-0.0153482	-0.0423304	-0.0945455	-0.0618109	0.146797	-0.0607634	-0.0508107	0.0302253	-0.0895528	0.0506686	-0.0542636	0.0144668	0.236709	-0.0468076	-0.0937424	TRUE		0	0	0
vocalise_away		0.0422264	0.437677	0.0467749	-0.0286537	-0.0546392	0.248959	0.0394811	-0.00171011	0.127645	0.0798627	0.346756	0.00993411	-0.0543647	0.0885102	-0.0101241	0.0503102	0.0172749	-0.0376294	0.0469707	0.155875	-0.0965187	0.213112	-0.0271462	0.191153	0.0668154	0.0912821	-0.218376	TRUE		0	0	0
jig_jog	Cut	0.0934606	0.383851	0.119557	-0.0186203	-0.110249	0.297485	0.13745	-0.0854155	0.0547278	0.0808053	0.280456	0.00500543	-0.00054712	0.0474037	0.168037	0.116768	0.0138309	0.0220186	-0.0422452	0.00260209	-0.0670343	0.144817	-0.0132315	0.124413	0.158545	-0.0310382	-0.0905519	TRUE		0	0	0
pull_back_away		0.167001	0.125688	0.115389	-0.0865243	-0.046194	0.80655	0.06851	-0.088294	0.0620829	0.0489129	0.0922255	0.0291102	0.0286537	-0.0313435	0.0682332	0.00616666	0.0352145	-0.0593728	-0.00263902	-0.0768335	-0.00308656	0.0160174	-0.0193023	0.0535744	0.0356005	-0.0169931	0.0876212	FALSE		1	0	1
stand_still_away		0.156931	0.382095	0.088063	-0.116258	-0.0645419	0.57494	0.185528	-0.0284832	0.0311852	0.0953218	0.248852	0.0338355	-0.0202631	-0.00334661	0.066287	0.0100699	0.00188185	-0.0315642	-0.0558915	0.0317747	-0.0888803	0.0936051	-0.000393292	0.0740281	0.102107	0.0206451	0.0491295	FALSE		1	0	1
rear_led_away	Cut	0.0481949	0.155714	0.110597	-0.0671535	-0.0248715	0.475222	0.0222998	0.0425332	-0.0514413	0.10118	-0.0378312	0.0787261	-0.174313	-0.125761	0.1209	0.00309816	0.0994423	0.162955	0.0675833	-0.0645028	-0.156557	0.10763	0.104399	-0.0844642	0.00109295	-0.0380738	-0.0609576	TRUE		0	0	0
enjoy_groom		-0.00471473	0.0358503	0.00343308	0.121117	-0.00226112	-0.0193636	0.0535484	0.103416	0.168457	0.0174746	0.0151667	-0.142747	0.0305038	0.0172679	-0.173983	0.129824	0.393053	0.00504667	0.197466	-0.0154103	-0.0295372	0.0147348	0.103743	-0.296398	-0.00712	-0.233318	0.134053	TRUE		0	0	0
undo_gates		0.0208538	0.0657289	0.13057	-0.0102681	-0.0593031	0.141241	0.0933344	0.0292168	0.0146051	0.0204147	-0.146585	0.0874384	-0.0671552	0.00877883	-0.0566698	0.0614108	0.501553	-0.0226362	0.0481519	-0.0344531	-0.0563292	-0.13938	0.100522	0.139432	0.0556593	-0.0462648	-0.0437167	FALSE		1	0	1
crib_bite		0.0142971	0.0825324	0.00568187	-0.00235851	-0.057199	-0.0414301	0.0326422	0.0244959	0.0894652	0.0643646	0.0333479	0.617494	-0.014075	-0.0433425	0.00938286	0.0713836	-0.191575	0.0705905	-0.0437045	-0.0947445	0.0223702	-0.0216002	0.176217	0.0279977	-0.0951874	0.0230555	-0.0321773	FALSE		1	0	1
windsuck	Cut	0.0121721	-0.0231977	-0.0306368	0.00182806	0.00805026	-0.0618098	0.0701258	0.0899637	0.040519	-0.0161459	0.0703395	0.125955	-0.00661845	-0.179829	-0.0601315	0.0165711	-0.00878269	-0.029169	-0.0110508	0.0899102	-0.147701	-0.132999	0.0852702	0.0227982	0.0725324	0.611323	0.0704949	FALSE		1	0	1
chew_rug		0.0586628	0.0268175	-0.0121828	-0.0705718	-0.00906819	0.0848313	0.0220045	-0.0449801	0.0273838	0.0104036	-0.0121152	0.626841	-0.032581	0.0206372	-0.156042	0.0472449	0.26983	-0.138766	0.0191195	0.0285103	0.0663107	-0.0437382	-0.0911938	-0.00433503	0.0759106	0.00809862	-0.0864409	FALSE		1	0	1
chew_wood		0.0786421	0.139232	0.0786364	0.0134528	-0.0409333	0.0280796	0.0584328	0.0635355	-0.101836	-0.020223	0.0575303	0.571906	0.00480658	-0.00170236	0.0986926	0.344823	0.079046	0.0623633	-0.0369406	0.00558935	-0.0937748	0.128783	-0.103197	0.0326113	0.118493	0.0851887	0.118947	FALSE		1	0	1
chew_bark		0.0482926	0.137257	0.0431339	0.00948782	-0.070212	-0.0311735	0.0542329	0.00474953	0.0170408	-0.0546725	-0.0245112	0.351609	-0.0161766	-0.0173315	0.0317944	0.583902	0.0825037	-0.0633703	-0.00817536	-0.0311138	-0.0566863	0.0724667	0.0143535	0.0274817	0.0386302	-0.0232455	0.0719884	FALSE		1	0	1
chew_lead	Cut	0.0879396	0.0323311	0.156002	-0.125755	0.0626992	0.0448392	0.151238	-0.0199384	-0.00784436	-0.0335324	0.0475732	0.445379	-0.0455782	0.0825653	-0.042756	0.118085	0.216416	-0.0685546	-0.0102761	-0.0641768	-0.095291	0.00414698	-0.0480322	-0.0764357	0.132736	0.0447796	0.1515	TRUE		0	0	0
eat_faeces		0.0804328	0.0207673	0.0533238	-0.0481519	0.00233111	0.00378092	0.0160911	0.0302633	-0.00271	-0.0457649	0.00626093	0.100759	0.00583022	-0.0240057	0.0448192	0.630923	0.0161867	0.0396381	0.0132129	-0.0483571	0.00939027	0.0281252	0.0547455	0.067217	0.216741	0.012711	-0.174681	FALSE		1	0	1
eat_soil		0.0504946	0.0722412	0.0107209	0.0323182	0.00802751	0.0762883	0.0963645	-0.0470905	0.134752	0.0461621	-0.00100194	0.0285732	-0.0652918	0.0509052	-0.0628691	0.689969	0.03539	-0.0476573	-0.101028	-0.0595934	-0.0387288	-0.0847668	0.00150256	0.0381363	-0.0803062	-0.0022229	0.0922369	FALSE		1	0	1
self_mutilate		-0.0174831	0.04003	0.1115	0.0601038	-0.0176203	0.0477709	0.0110037	-0.0462274	-0.0117793	0.00111781	-0.0955342	-0.0350158	-0.0753621	0.00622766	-0.0438649	-0.0154786	0.124031	0.00664915	0.159275	-0.109574	0.0831637	0.129262	-0.0615507	-0.0219195	-0.00773499	0.643919	-0.054483	FALSE		1	0	1
dunk_hay		0.0567381	-0.0390241	0.0520456	0.0142561	0.0104984	-0.0234048	-0.0361756	0.0630068	-0.0198107	-0.0539783	0.174393	0.00937629	-0.0114437	0.00569235	0.0544053	-0.0371558	0.605453	0.098196	-0.17635	-0.0466401	0.0453618	0.0736407	0.0133112	0.142705	0.0331006	0.203081	0.0346582	FALSE		1	0	1
play_water		0.0473045	0.0593794	0.0125604	0.0154874	-0.0352891	0.0135225	-0.00307202	-0.0140743	0.201497	0.0949261	-0.0501838	0.0993119	-0.0203669	-0.0142072	0.0582323	0.0882582	0.633776	-0.0324537	0.0203566	0.0754069	0.0669181	0.0760607	-0.068061	0.0302319	-0.0744646	0.0241272	-0.0349391	FALSE		1	0	1
paw_prior_feed		0.0702445	0.122228	0.0561013	-0.0283668	0.0239372	0.0248498	0.716963	0.0401129	0.0687296	-0.0501834	0.0791192	0.0337083	0.0152712	-0.091915	0.0676978	0.0441652	0.136074	-0.0611805	0.0247467	-0.0339555	0.0294	0.0473101	-0.0169355	0.0518492	0.110575	-0.0187002	-0.0360758	FALSE		1	0	1
paw_feeding		0.125466	0.11162	0.0034561	-0.10634	0.0182401	0.0365231	0.785832	0.00307684	0.074695	0.0388585	-0.0383181	0.0455915	0.0181393	-0.00712973	0.0323503	0.0675434	-0.072437	0.00477199	0.00370828	0.0175116	-0.0530322	0.027532	0.0321761	-0.0377454	-0.0429899	0.0307354	0.0304737	FALSE		1	0	1
hold_foot_feeding		0.0483799	0.0812016	0.00764695	0.0209921	-0.064659	0.0794861	0.715901	-0.0783302	0.00254051	0.0605244	-0.0192324	0.0670258	-0.0739811	0.0421575	0.0890887	0.0585158	-0.0518203	0.0222215	-0.0619342	0.0196834	-0.0115801	-0.093369	-0.0896005	0.0470469	-0.17743	0.0630634	0.0880969	FALSE		1	0	1
defecate_feed_bin	Cut	0.014207	0.0243549	0.0154728	0.139678	0.022757	-0.015398	0.0374659	-0.0104757	-0.0646245	-0.0169362	0.0605009	0.0487453	-0.0145112	-0.0799817	0.090843	0.088841	0.151164	0.00341227	0.0375052	-0.0454179	0.0116695	0.0160782	0.10506	0.622058	-0.0334058	0.0155277	0.034419	FALSE		1	0	1
urinate_hay	Cut	-0.0132892	0.121423	0.0616525	0.00179588	-0.0858518	0.118555	-0.0024399	-0.156062	0.113034	0.0343536	-0.0230795	-0.160566	0.0105089	-0.113908	-0.032115	0.278575	0.145386	-0.0395195	0.0184664	-0.0449545	0.074413	-0.0577164	-0.01162	0.39342	-0.0312878	-0.0468947	0.0593606	TRUE		0	0	0
box_walk		0.13477	0.41927	0.127135	-0.0277921	0.0511269	0.205924	0.134206	0.0353287	-0.0502889	-0.144709	-0.0424302	0.150702	-0.0433919	-0.0297938	0.00702592	-0.077635	-0.0719816	0.0332251	-0.030805	0.00672524	-0.0187093	-0.0488486	-0.00981348	0.343296	0.0969314	-0.00425968	0.480663	TRUE		0	0	0
fence_walk		0.0670645	0.499487	0.10159	-0.0529499	-0.0231245	0.00507117	0.0708568	-0.0476616	0.078216	0.0368642	-0.0138862	0.234387	-0.0659734	-0.0612137	0.122626	0.0470348	0.0218433	-0.00506826	0.0955315	-0.0670227	-0.00158173	-0.022528	-0.0532126	0.134264	0.104733	-0.161251	0.340918	TRUE		0	0	0
head_shake	Cut	0.058856	0.129901	0.138921	-0.133818	0.00462439	0.00826425	0.195262	0.0594299	0.165567	0.042836	0.120113	-0.0847299	-0.0060699	-0.0369182	0.0660127	0.106117	-0.151558	0.0855151	-0.046298	-0.0420541	-0.0725681	0.237004	0.00467868	0.0372968	0.435815	0.0669628	-0.0435101	TRUE		0	0	0
lip_smack	Cut	0.0102083	0.110146	0.126221	-0.0174656	0.0121791	-0.0636814	-0.0945517	-0.0783715	0.221955	-0.0355983	0.0179543	0.121726	0.023095	-0.0605414	0.154281	-0.0509418	0.225088	0.128375	-0.101799	0.0652572	-0.0380548	-0.203167	-0.0287627	-0.00252184	0.399667	-0.00688025	-0.117784	TRUE		0	0	0
grind_teeth	Cut	0.0770705	0.0464129	0.0264553	-0.00989713	-0.031	0.0935504	-0.0818275	-0.0674299	0.0304379	0.0694707	-0.00533667	0.0926041	-0.0482745	-0.00919299	0.0146761	0.108898	0.000782192	-0.0431822	-0.00169241	0.0670479	-0.00913868	-0.0360284	-0.0225323	-0.0477457	0.656824	0.0431332	0.106379	FALSE		1	0	1
yawn_before		0.0353501	0.0580694	0.0760842	-0.000418825	-0.00759854	0.0141393	0.0744603	-0.0111098	0.74001	0.00480368	0.135898	0.0551526	0.010775	-0.0453133	0.0201996	0.0642032	0.0484763	0.00651134	0.00286571	-0.0606236	-0.00426379	0.0395179	-0.00293959	-0.0203928	0.136982	0.0162371	0.000140575	FALSE		1	0	1
yawn_during		0.0916495	0.0309131	0.0332994	-0.0200064	-0.0799136	0.0109092	0.0424331	-0.034132	0.809133	0.000327742	-0.0548095	-0.00570092	0.00912312	-0.00502683	-0.0218581	0.0622173	0.0837817	0.0201406	-0.065346	-0.0683145	0.0100681	-0.0903853	-0.0498304	-0.0465221	-0.00155371	0.00485368	-0.0258524	FALSE		1	0	1
yawn_after		0.10136	0.0549941	0.0191474	0.0142713	-0.0107241	0.0345182	0.0341973	-0.0186827	0.80286	0.0159226	0.00391505	-0.00365561	0.0158193	0.0454764	0.0214857	0.0070057	0.0619516	-0.006969	0.0275487	-0.0155827	-0.0224452	0.0834544	0.0258694	0.02699	0.00769248	-0.00686274	0.0243129	FALSE		1	0	1
Greater 0.5		12	7	6	5	6	3	3	2	3	4	3	3	2	3	2	3	3	2	2	2	2	2	2	1	1	2	0
Less than -0.5		0	0	0	0	0	0	0	0	0	0	0	0	0	0	0	0	0	0	0	0	0	0	0	0	0	0	0
TOTAL		12	7	6	5	6	3	3	2	3	4	3	3	2	3	2	3	3	2	2	2	2	2	2	1	1	2	0
E-BARQ-t Miscellaneous items	Loading (RCM)
Crib-bite	0.617494
Chew on rugs	0.626841
Chew on wood	0.571906
Defecate in feedbin	0.622058
Undoo gates	0.501553
Dunk hay	0.605453
Play with water	0.633776
Wind-suck	0.611323
Self mutilate	0.643919
Defensive when round penned	0.60159
Defensive when asked to canter	0.705159
Defensive with familiar dogs	0.640131
Defensive with unfamiliar dogs	0.684683
Defensive when approached in paddock	0.643517
Defensive when approached in stable	0.647454
Defensive when approached when eating	0.530675

## Sheet: Supp 2 Maintenance
	Cut Based on FA	RC1	RC2	RC3	RC7	RC4	RC5	RCM	RCM	RC6	RCM	RCM	RCM	RC8		Number of Factors loading
arena		0.020841	-0.0500591	0.434833	-0.0518787	0.165627	0.357806	0.0959455	-0.347662	0.00186726	-0.132652	0.260001	-0.11614	0.0835863		0	0	0
bareback_pad		0.0975084	-0.00119531	0.0849969	0.629915	-0.0799203	-0.0220808	-0.0114353	0.0490759	-0.0757608	-0.0528472	0.0937478	-0.112281	-0.0502906		1	0	1
beginners		0.816275	0.00481701	0.0531857	0.0686477	-0.0208592	0.05757	-0.083578	0.0100233	-0.0341628	-0.034394	0.0403997	0.0272973	-0.00166294		1	0	1
bitless		-0.051102	0.0743129	0.0229022	0.779544	-0.0138381	0.00239372	0.0354562	-0.03781	-0.0785513	0.0119637	-0.128455	0.141552	0.00257904		1	0	1
body_work		-0.0915809	-0.0479868	0.118951	0.0426016	0.0460282	0.233342	0.577981	0.0410749	0.0513772	-0.0472065	0.0113821	-0.00355248	-0.0340129		1	0	1
bosal		0.00183455	0.410325	-0.025802	0.153423	-0.394792	0.128311	-0.00325538	0.0344034	-0.175631	-0.062663	0.220234	0.0142037	-0.118339		0	0	0
cavasson		0.00591392	0.118945	-0.085733	-0.19608	0.444219	0.118967	0.0363291	-0.451036	0.0597013	0.0386308	-0.144401	-0.020069	-0.0428442		0	0	0
children_ride		0.838584	-0.0279902	0.015629	0.066845	0.00301448	0.107636	-0.0818444	0.0258785	-0.0396979	-0.0338703	0.00058493	0.0286561	-0.0260943		1	0	1
clicker_walk		0.240391	-0.0284423	0.38264	0.298343	0.0199289	-0.0761256	0.030779	0.0574972	-0.0352686	0.0215903	0.0189905	0.480864	-0.0800657		0	0	0
crank_flash		0.0226547	0.184059	-0.0731885	-0.0901724	0.0428429	-0.0585657	0.166263	-0.0528201	0.162812	0.116407	0.533633	-0.0710595	-0.0309451		1	0	1
crank_no_flash	Cut	-0.0128992	0.165606	0.0208838	-0.0721694	0.0283107	-0.022407	-0.0921429	-0.0231929	0.218899	0.0440078	0.533633	0.064541	0.055807		1	0	1
crupper		-0.0381901	0.608344	-0.0171047	0.0102967	-0.0572208	0.028127	-0.107699	0.0129744	0.174307	-0.0938279	-0.105156	0.129316	0.0764765		1	0	1
double_bridle		0.0105108	0.226455	0.00421531	-0.0277226	0.0467322	0.061972	0.0929471	0.0237894	0.669308	0.0480134	0.375944	-0.0272694	0.00464397		1	0	1
draw_reins		-0.00166182	0.682577	0.0855534	-0.00902524	0.06502	-0.0013374	0.0350925	0.0322672	0.0335601	0.0143125	0.0552269	-0.140536	-0.0109708		1	0	1
draw_riding		0.0714516	0.637711	0.101841	-0.0393964	-0.0721329	-0.0689461	0.0713627	-0.0588322	0.0888191	0.10027	-0.0437157	-0.0909392	-0.0357107		1	0	1
drop_noseband		-0.0260866	0.0411203	0.0984817	-0.00832755	0.150437	0.174735	0.0516474	-0.030295	0.170465	0.133586	0.0398617	-0.375363	0.0358076		0	0	0
english_curb		-0.00626804	0.0230785	-0.0242137	0.0182006	-0.03128	0.0793287	0.0213106	-0.0696988	0.822845	0.0194591	0.127708	-0.0159652	0.0398219		1	0	1
english_saddle		0.0182409	-0.0456476	-0.0108919	-0.150495	0.717107	0.0509523	0.0831832	-0.306046	0.0120138	0.091179	0.246157	-0.0124592	0.0565454		1	0	1
float		0.0873175	0.0462411	-0.000237752	-0.0999155	-0.0450387	0.725574	0.139999	-0.00180376	0.0819897	0.0542451	-0.028903	-0.115645	-0.0898281		1	0	1
food_ridden	Cut	0.152431	-0.00473805	0.320495	0.100293	0.129572	-0.132217	0.0526109	-0.199395	-0.0656436	-0.0200399	0.132399	0.550769	-0.12293		1	0	1
gag_bit		-0.0416012	0.0262565	-0.0500704	0.0874941	-0.0601307	-5.13696e-05	-0.0564802	-0.0286736	0.144442	0.653469	0.0856153	-0.0335068	0.0656283		1	0	1
grackle		0.0261992	0.202131	0.0074223	-0.0245553	0.0328942	0.116474	-0.00231093	-0.000631295	0.0173559	0.48049	0.36849	0.118124	0.0251882		0	0	0
grass_reins		0.0655522	0.727857	-0.12766	0.0750825	-0.0236734	0.0627938	-0.0132722	0.0639693	-0.0339045	0.00815518	0.192491	0.100629	0.0580249		1	0	1
ground_work		-0.0232132	-0.0199772	0.704479	0.149153	-0.0128413	0.0630521	0.00279922	0.0298665	-0.0708043	-0.205669	0.0332606	0.100381	-0.0197298		1	0	1
hackamore		-0.0751834	0.397238	-0.0362385	0.351122	0.0356315	0.0967475	0.0367997	0.068643	-0.128029	0.153116	0.123746	0.0909745	-0.0410586		0	0	0
headcollar_ride		0.139111	-0.0323235	0.0194906	0.588051	0.0213811	-0.0121586	-0.036547	0.25872	-0.0526395	0.00122416	0.0633518	-0.14187	-0.0676091		1	0	1
housing_company	Cut	0.0374494	0.0356609	0.0111616	-0.0702768	-0.0352955	-0.244961	0.259062	-0.159454	0.221143	0.204187	-0.0810918	-0.170072	-0.01059		0	0	0
lesson		0.168103	-0.0486374	0.219143	-0.00699098	0.0345811	0.437855	0.117883	-0.223219	-0.0298681	-0.0637991	0.260132	-0.290128	0.0642273		0	0	0
long_rein	Cut	0.398743	0.147568	0.452298	0.0125047	0.111264	0.0399402	-0.0641583	0.0851601	0.128267	-0.0538436	-0.262367	0.128753	0.0403945		0	0	0
lunge		0.130926	0.018491	0.733326	-0.106945	0.0046348	0.0168888	0.0693709	-0.0649937	0.0268422	0.0576249	-0.0672607	-0.0171415	0.0468513		1	0	1
lunged_necessary		-0.0448448	0.0223296	0.557779	-0.150668	-0.151088	-0.309841	0.129273	0.0483474	0.003416	0.0963326	-0.0559986	-0.226404	-0.0288447		1	0	1
men		0.724075	0.0650289	0.0754722	-0.0665765	-0.0927029	0.0438392	0.113603	0.0171747	-0.0209476	0.00781225	-0.0621538	0.0456786	-0.0532575		1	0	1
no_noseband		-0.0361767	0.0405849	0.0324286	0.0967602	-0.109737	0.0147516	-0.0393847	0.641611	-0.115634	-0.112663	0.0584285	0.0220813	-0.0138994		1	0	1
professionals		0.542178	0.0105082	0.272526	-0.105315	-0.011152	0.057906	0.17496	-0.0353035	0.0644576	-0.0631843	0.0774241	0.00358318	0.00944838		1	0	1
round_pen_fast		0.196686	0.0380088	0.636721	0.214727	-0.136252	0.0593566	-0.055601	0.208677	-0.0225534	0.00928427	0.0431315	0.0958768	0.0258775		1	0	1
running_martingale	Cut	0.00438769	0.107653	-0.0340527	-0.108476	0.102966	0.0918263	-0.00241821	-0.0494109	-0.0949148	0.691496	-0.0276918	-0.0238283	-0.00832875		1	0	1
shod_times	Cut	0.0202495	0.0238736	-0.0464552	-0.224884	0.101112	0.255115	0.386666	-0.19732	0.0227716	0.313269	-0.037839	-0.0505058	0.211049		0	0	0
show		0.253287	0.0634804	0.0259892	-0.0955119	-0.0546507	0.605531	0.170028	-0.0772337	0.123944	0.0682732	-0.0535953	-0.029437	-0.0158566		1	0	1
side_reins	Cut	0.0235798	0.365768	0.254585	-0.142527	0.138554	0.000791981	0.0923101	-0.200664	0.174092	0.180062	0.0329021	-0.188504	-0.101308		0	0	0
snaffle		0.0701564	-0.016814	0.0508306	-0.608686	0.418241	0.101657	0.0827445	0.101172	-0.213055	-0.0503004	0.176156	-0.173878	0.0131527		0	1	1
standing_martingale		-0.0173461	0.550875	-0.0127497	0.0478447	0.00782568	0.019899	0.0175492	0.00483796	-0.00273009	0.171236	0.189885	-0.0374701	0.0684877		1	0	1
stock_saddle	Cut	0.0202637	0.0275693	0.037436	-0.0815305	0.0524116	0.0349615	0.0669408	0.70877	0.0611815	0.0233209	-0.187245	-0.0804135	-0.140233		1	0	1
teenager		0.77033	-0.0269589	-0.0117926	0.104279	0.0616916	0.0443025	-0.0230564	-0.0643108	0.0245258	0.0906355	0.0202335	-0.0484837	0.000388735		1	0	1
teeth		0.0517774	0.0439845	-0.0410233	-0.0291234	0.0195499	0.123919	0.647054	-0.0159366	0.0177585	-0.0706848	-0.00364187	-0.00947439	0.0874144		1	0	1
time_spent	Cut	-0.0700514	-0.0339699	-0.035413	-0.0463522	0.00390484	0.256453	0.020951	-0.0086676	0.113598	0.0683347	-0.0239893	0.559676	0.0787837		1	0	1
trail		0.014039	0.0353129	-0.0590183	0.0618045	0.0651372	0.566704	-0.0614381	0.135087	-0.0606556	0.132727	-0.0374974	0.235442	0.00322467		1	0	1
treeless_saddle		-0.0288834	0.0586461	-0.0140192	0.516107	-0.00480472	-0.0587512	-0.0682845	-0.0681212	0.143116	-0.0803845	-0.170489	0.123333	0.0453474		1	0	1
trimmed		-0.0366643	0.0128532	0.0470605	0.00936383	0.0364428	0.0513255	0.233645	0.0192038	-0.00354584	0.00568732	0.0371397	0.0168994	0.806917		1	0	1
trimmed_nonprofess		0.0262462	-0.0558955	0.00552145	0.0801453	-0.0104072	0.10529	0.0156097	0.144583	-0.049305	-0.0801502	-0.00285435	0.0505793	-0.774876		0	1	1
vet_visit		0.0259446	-0.0228264	0.0187294	0.00623927	0.00428289	-0.0650762	0.643758	-0.140155	-0.0713513	0.0736157	0.0421577	0.0687125	0.0135653		1	0	1
western_saddle		0.0359679	0.0340683	0.0719944	0.0114537	-0.862293	-0.0296436	-0.0686805	0.0565181	-0.0915613	-0.0623692	-0.0236147	-0.102274	-0.0685358		0	1	1
western_shank		0.0257434	-0.00818353	0.00374084	-0.0277324	-0.691129	0.049497	0.0388564	-0.106875	0.115516	0.0569449	0.0259023	0.0674201	0.0594456		0	1	1
wormed_times		0.0233842	0.0688215	0.0624459	-0.0615043	0.0179523	-0.0558328	0.507069	0.259075	0.0994609	-0.0590704	0.0454535	-0.0487997	0.105053		1	0	1
Greater 0.5		5	5	4	4	1	3	4	2	2	2	2	2	1
Less than -0.5		0	0	0	1	2	0	0	0	0	0	0	0	1
TOTAL		5	5	4	5	3	3	4	2	2	2	2	2	2
E-BARQ-m Miscellaneous items	Loading (RCM)
Time spent with horse	0.559676
Trained with food rewards	0.550769
No noseband	0.641611
Australian stock saddle	0.70877
Body work	0.577981
Dental procedures	0.647054
Veterinary care	0.643758
Worming	0.507069
Gag bit	0.653469
Running martingale	0.691496
Crank noseband with flash	0.533633
Crank noseband without flash	0.533633

## Sheet: Supp 2 Equitation
	Cut based on FA	RC1	RC2	RC3	RC8	RC5	RC4	RC10	RC7	RC6	RCM	RC11	RC9	RCM	RCM	RC16	RC15	UNLOADED		Number of Factors loading
quick_food		0.106953	0.00530878	-0.0274812	0.0199925	-0.0716146	-0.114066	-0.0507667	-0.0326986	-0.00454855	0.354258	-0.124198	0.0452159	-0.33589	-0.122356	-0.0639738	-0.123548	TRUE		0	0	0
quick_pressure		-0.0765386	-0.0995587	-0.179233	-0.180119	-0.089364	-0.00535135	-0.130812	-0.0875641	-0.0918856	0.64421	-0.21806	-0.0894287	-0.0171129	-0.0378223	0.00996641	-0.108113	FALSE		1	0	1
quick_correct		-0.110022	-0.0639031	-0.166265	-0.175146	-0.0305098	-0.0183334	-0.0622949	-0.118283	-0.0213256	0.74148	-0.21056	-0.00951639	0.0145635	-0.0202635	-0.0516331	-0.0449434	FALSE		1	0	1
quick_punish		-0.146586	-0.053804	-0.000586273	0.0888288	-0.0323241	-0.00886139	0.0793156	-0.0112041	0.0897203	0.703877	0.226009	-0.144194	-0.0171632	0.0366737	0.00461784	0.135006	FALSE		1	0	1
back_not_forward		0.10357	0.0790065	0.185161	0.0608621	0.0466977	0.173903	0.132273	0.0871217	0.132777	-0.019077	0.0317501	-0.145681	0.0218779	0.538592	-0.0101811	0.149098	FALSE		1	0	1
no_forward		0.103845	0.0869934	0.489121	0.063158	0.0391861	0.0908725	0.162674	0.0594958	0.121945	-0.0334145	0.0559199	0.0578463	-0.0922394	0.516101	0.0595552	0.119642	FALSE		1	0	1
rears_forward		0.109245	0.0693446	-0.0190139	0.0492443	0.0578621	0.720259	0.152915	0.0139771	-0.0216306	0.0115047	0.0183451	0.0587283	0.024252	0.247376	0.0498533	0.0718665	FALSE		1	0	1
slows_when_asked_fast	Cut	0.144082	-0.00137744	0.423617	0.0991376	-0.0248898	0.163761	0.238738	0.0250966	0.0718891	0.000379544	-0.0589189	0.228049	0.0334254	0.335823	0.123466	0.0298558	TRUE		0	0	0
no_slow		0.364747	0.0730586	-0.145195	0.162497	0.608561	0.0647516	0.175548	0.0506668	0.0909645	-0.0549032	0.164401	-0.0855133	-0.0865273	0.225093	-0.0193613	0.0309396	FALSE		1	0	1
no_stop		0.322388	0.136109	-0.0800427	0.151886	0.628484	0.10531	0.233817	0.0521358	0.118277	-0.0752451	0.103672	-0.0531768	-0.0788741	0.280453	0.0220313	-0.0576996	FALSE		1	0	1
no_straight	Cut	0.456903	0.0917294	0.32364	0.167984	0.161554	0.0362855	-0.0325304	0.0292718	0.112061	-0.12955	0.0313304	-0.0555354	-0.07773	0.0968349	0.0955152	-0.102376	TRUE		0	0	0
voice_fast	Cut	0.019902	0.00612748	0.298975	0.0576651	0.0108785	0.0200048	-0.0147798	-0.00223802	-0.00933887	-0.0769927	0.753457	0.10721	0.0760834	0.0676338	0.0310091	-0.0164868	FALSE		1	0	1
voice_slow	Cut	0.177936	0.0464777	-0.0691761	0.108809	0.339482	0.00917898	-0.0206988	0.0340537	0.0204659	-0.136238	0.700657	0.0365106	0.148103	0.00111214	0.00705183	-0.0420952	FALSE		1	0	1
leg_pressure_walk_trot		0.0333449	0.0426719	0.777536	0.0278102	0.0812095	0.00278227	0.0540962	0.0595887	0.00251304	-0.0498118	0.0417482	0.239828	0.0592798	0.139789	0.0748942	0.0478912	FALSE		1	0	1
leg_trot_canter		0.0661447	0.0867572	0.786811	0.073499	0.0140924	-0.050043	0.0817068	0.0269897	-0.020746	-0.0312882	0.0204942	0.10775	0.0431139	0.129067	0.0614806	0.0284633	FALSE		1	0	1
rein_turn		0.114625	0.00291091	0.499952	0.0897238	0.455628	0.0795142	-0.0734131	0.0241974	0.0294875	-0.0603083	-0.0117908	0.161438	0.0824503	-0.11875	0.108727	-0.084732	TRUE		0	0	0
rein_tension_halt		0.0875549	0.110894	0.216536	0.0890641	0.746381	0.0230586	-0.0331334	0.0555214	-0.0251766	-0.00862056	0.0534884	0.172688	0.141832	-0.112105	-0.0321919	0.0212814	FALSE		1	0	1
rein_slow		0.129293	0.0683726	0.170372	0.0578117	0.771684	0.0188168	-0.0747635	0.0603709	-0.0439982	-0.0452678	0.0640841	0.0134895	0.0721345	-0.0314521	0.0211334	0.117262	FALSE		1	0	1
seat_speed		0.170964	0.04954	0.672766	0.136547	0.0959207	-0.0123602	0.0387207	0.0259495	0.0323989	-0.201691	0.21451	-0.17354	-0.0168982	-0.090465	-0.158648	-0.0230987	FALSE		1	0	1
seat_slow	Cut	0.205748	0.0887745	0.392169	0.14048	0.348584	-0.0234361	0.0285102	0.0260236	0.0721195	-0.178727	0.279163	-0.345049	0.0490214	-0.119606	-0.183638	0.00989893	TRUE		0	0	0
whip		-0.0554327	0.0219682	0.367637	-0.00576574	0.0785528	0.0505033	0.106289	0.0808578	0.191939	-0.207567	0.160961	0.639306	-0.114767	-0.0922878	-0.0223582	0.00337953	FALSE		1	0	1
spur		0.0783422	0.0856292	0.401307	-0.00858504	0.186214	-0.0131892	0.195522	0.0253286	0.11721	-0.167459	0.0883952	0.680426	-0.0760125	-0.0634337	-0.0478501	-0.0193984	FALSE		1	0	1
pull_leading_forward		0.127871	0.00975237	0.0945107	0.81077	0.0454614	0.0392405	-0.0427922	0.0586688	-0.0034784	-0.0487109	0.0029951	0.0860391	0.0832034	0.148015	-0.0893499	-0.0765153	FALSE		1	0	1
pull_leading_stop		0.144528	0.00571838	0.0481671	0.799501	0.120469	0.032128	0.0348771	0.088305	0.0208482	-0.0137203	0.0328733	0.0698175	0.112611	0.144597	-0.0765355	-0.0229012	FALSE		1	0	1
buck_field	Cut	0.00949267	-0.0373267	-0.0779632	0.101311	0.0840195	0.0845935	0.346205	0.0161437	0.074695	0.103654	-0.145125	0.0296325	-0.0661703	-0.355709	0.0983626	0.443985	TRUE		0	0	0
rear_led		0.077516	0.039253	0.0920922	0.135799	0.0276039	0.741681	0.10964	0.0527842	0.0696612	-0.0400305	-0.0126872	0.0287319	-0.106408	-0.156206	-0.0360071	0.0423829	FALSE		1	0	1
rear_and_flip		0.0984523	-0.0454025	-0.00919702	-0.096841	0.0489538	0.679917	0.160093	0.0251557	0.129738	-0.00775069	0.0362842	-0.0854664	-0.0107336	-0.0467671	0.0192666	-0.183212	FALSE		1	0	1
refuse_cross_water_led		0.104614	0.124672	0.00617143	0.0720445	0.0254332	0.0567261	0.00988047	0.0481368	0.882042	0.0301479	0.00427774	0.138805	0.0322671	0.04372	-0.00512883	0.0874989	FALSE		1	0	1
catch_field	Cut	-0.0527586	-0.0709493	-0.0389752	-0.0103283	-0.0164919	0.0223438	-0.0504388	-0.0285169	-0.0671199	0.00381354	-0.147459	-0.015597	-0.687088	-0.0145593	-0.0271691	0.172919	FALSE		0	1	1
move_catch	Cut	0.114928	0.0578209	0.0218517	0.0810241	0.0755856	0.016018	0.0535503	0.10968	0.0434931	-0.0172666	-0.0238182	-0.106031	0.729463	-0.0598626	0.0181198	0.171792	FALSE		1	0	1
pull_back	Cut	0.104627	0.193277	0.00816603	0.160945	0.0607803	0.143092	0.0433206	0.480649	0.102385	-0.0250988	-0.0556826	0.158817	0.171464	0.0647895	-0.00132048	0.0926294	TRUE		0	0	0
head_up_bridled		0.159094	0.0798662	0.0862763	0.0719956	-0.0227729	-0.0454496	0.0746711	0.75459	0.0196467	-0.0693208	0.15648	0.0239287	0.00716603	0.0293119	-0.0219391	-0.0472544	FALSE		1	0	1
pull_back_bridled		0.102434	0.0555816	0.0639599	0.062542	0.0302029	-0.00603351	0.0646346	0.835973	0.0711835	-0.00123303	-0.000101848	0.00115856	-0.0307639	0.0343417	0.0831616	-0.00197545	FALSE		1	0	1
pull_back_unbridled		0.158711	0.0992514	-0.0242935	0.135692	0.139326	0.115353	-0.0729624	0.600088	-0.0187981	-0.120137	-0.0922978	-0.0769948	0.0997674	-0.012111	0.000450703	0.0139458	FALSE		1	0	1
load_first_time		0.0128472	-0.79872	-0.0674509	-0.032768	-0.0545122	-0.0295923	-0.0339687	-0.146752	-0.176939	0.0450979	-0.113017	0.0498512	0.101762	-0.00509111	0.0577778	-0.0652926	FALSE		0	1	1
load_first_time_truck		0.0385539	-0.833446	-0.0394754	0.0383524	-0.0206117	0.0137784	-0.041719	-0.139438	-0.132128	0.111127	-0.0632275	0.00182586	0.0874479	-0.0163321	0.0687182	-0.0772444	FALSE		0	1	1
unload_slowly		-0.111741	-0.756696	0.0465576	-0.0689048	-0.0886326	0.0681795	0.0186738	-0.0114058	0.0199265	0.0356182	-0.000132023	-0.118011	-0.110826	-0.100978	-0.0319395	0.145985	FALSE		0	1	1
rush_back_load		0.093742	0.686116	0.133858	0.0728917	0.0174965	0.0677393	0.0413284	0.0313264	0.0663726	-0.0193795	-0.0435291	-0.0531137	0.0791337	0.0151539	0.178181	-0.0393734	FALSE		1	0	1
unload_slowly_truck		-0.0763295	-0.782003	0.00871667	-0.0841285	-0.125868	-0.00072971	0.0013069	-0.0220194	0.0507644	0.0688156	0.0977178	-0.116372	-0.169671	-0.0815107	0.0473176	0.0238104	FALSE		0	1	1
rear_load	Cut	-0.0798872	0.49456	0.102572	0.131576	0.0126955	0.239784	-0.0294486	0.0712004	0.103742	0.137829	0.0741533	-0.140965	-0.0171001	-0.181678	-0.0658128	0.161992	TRUE		0	0	0
rush_gates		0.02483	0.177168	0.0444614	0.473519	0.0826751	0.0269977	0.101211	0.161958	0.0888278	0.0159195	0.0164548	-0.236427	0.00789285	-0.0819183	0.058882	0.13711	TRUE		0	0	0
push_led		0.174711	0.0926325	0.0650948	0.67429	0.0690896	0.0767254	0.0898717	0.0728396	0.066751	-0.0768546	0.0534967	0.0324966	-0.0451701	-0.125482	0.118254	0.00149678	FALSE		1	0	1
push_with_food		0.138805	0.0719957	0.094082	0.538221	0.066569	-0.00241128	0.127426	0.0716991	0.0718867	-0.086818	0.0839424	-0.0861908	-0.0516582	-0.0207463	0.193983	0.089725	FALSE		1	0	1
raise_head		0.695556	0.0235914	0.0913232	0.0478581	0.114807	0.0952967	0.131367	0.146529	0.0939444	-0.0111879	0.0537189	-0.00180029	0.136643	-0.0460777	0.0159131	0.0331597	FALSE		1	0	1
toss_head		0.68514	0.0123229	0.119976	0.0979471	-0.0354446	0.140591	0.141931	0.12274	0.129197	-0.0690906	-0.0642627	0.0608367	0.0879025	-0.0392566	-0.00487852	-0.0404124	FALSE		1	0	1
buck_at_canter		0.294729	0.0831664	0.181975	0.0705439	-0.0242185	0.0856185	0.690016	0.010184	-0.00798534	0.0307854	-0.00137511	0.0894937	0.0202809	0.0666665	0.0289736	0.00118684	FALSE		1	0	1
bolt		0.119754	0.0900587	-0.0222852	0.11258	0.337322	0.217501	0.368649	0.0762779	0.0946496	-0.0747757	-0.0640511	0.00137075	-0.132845	0.191737	0.125205	-0.287738	TRUE		0	0	0
pull_on_reins		0.689684	0.0102729	0.0669752	0.263013	0.164602	0.0660609	0.071347	0.111602	0.00539831	-0.0517736	0.0365155	0.00660712	-0.0333727	0.0257993	-0.028889	0.0316594	FALSE		1	0	1
brace_neck		0.683572	-0.0127776	0.0615719	0.144919	0.133574	0.120988	0.0874042	0.0906726	0.00145456	-0.034469	0.0503132	0.0541523	-0.00532026	0.143149	0.0582642	0.0661684	FALSE		1	0	1
excited_canter		0.64477	0.10202	0.000251929	0.0159774	0.184978	-0.018896	0.167168	0.0789499	0.0878424	-0.071594	0.0772977	-0.0753687	0.0440589	0.0609701	0.0630416	0.0983537	FALSE		1	0	1
buck_ridden		0.157438	-0.0539903	0.0224168	0.061922	0.0430736	0.196872	0.776906	0.0748333	0.0236481	-0.0642652	0.0128615	0.121143	0.0390578	0.0233995	0.040868	-0.0120297	FALSE		1	0	1
unseat_rider		0.102436	0.0357589	0.0926254	0.081378	-0.00311874	0.229821	0.740099	0.0105069	0.0482263	-0.0699005	0.00230862	-0.045353	0.121815	0.0863162	0.0146255	0.0112858	FALSE		1	0	1
rear_saddle		0.0978419	0.0506804	-0.0261002	0.0579331	0.0263222	0.779069	0.115053	0.0433436	-0.0329559	-0.0404125	-0.012301	0.0383387	0.131481	0.175112	0.0154422	0.0450045	FALSE		1	0	1
refuse_cross_water_ridden		0.111949	0.114342	0.0101016	0.0571194	0.0166743	0.0266046	0.0184168	0.039123	0.898248	0.00663847	-0.0329031	0.0713605	0.0457783	0.071028	-0.023734	0.054407	FALSE		1	0	1
refuse_to_jump		0.178964	0.139266	0.161439	0.102564	0.0135463	0.100181	0.115187	0.0951458	0.421833	-0.0845095	0.0858848	-0.119289	0.0913135	0.0505036	0.186007	-0.0503856	TRUE		0	0	0
canter_ridden		-0.127149	-0.0224939	-0.0589144	-0.0240027	-0.0470183	0.0267481	0.0639139	-0.0139656	-0.0875216	0.0817717	0.00374709	0.0123946	-0.0313622	-0.196029	0.0229268	-0.703823	FALSE		0	1	1
groan_ridden		-0.00718935	-0.031261	0.0865041	0.0652306	0.0331858	0.00680812	0.106918	0.0468803	0.0551066	-0.0822592	-0.0580197	-0.105359	0.072413	0.0201849	0.802389	-0.0764631	FALSE		1	0	1
btv_trot		0.330979	0.0448119	-0.00965993	0.08865	-0.0312608	0.0456699	-0.0341324	0.00922703	-0.03136	0.0820883	0.206465	0.277596	-0.018199	-0.00852874	0.523266	0.180964	FALSE		1	0	1
Greater 0.5		5	1	3	4	4	4	3	3	2	3	2	2	1	2	2	0
Less than -0.5		0	4	0	0	0	0	0	0	0	0	0	0	1	0	0	1
TOTAL		5	5	3	4	4	4	3	3	2	3	2	2	2	2	2	1
E-BARQ-e Miscellaneous items	Loading (RCM)
Easy to catch in the field	-0.687088
Move away when being caught	0.729463
Learns quickly from pressure	0.64421
Learns quickly from correction	0.74148
Learns quickly from punishment	0.703877
Moves back when signalled forward	0.538592
Does not go forward when signalled	0.516101
